# Supplementary material for: Novel Concept of Alpha Satellite Cascading Higher-Order Repeats (HORs) and Precise Identification of 15mer and 20mer Cascading HORs in Complete T2T-CHM13 Assembly of Human Chromosome 15
Source: MDPI journal article supplement (doi:10.3390/ijms25084395), 2024-04-16
Supplement: s1 [file s1]

**Supplementary Materials for**  
**Novel concept of alpha satellite Cascading Higher Order Repeats (HORs)**  
**and exemplification of active 15mer Cascading HOR in T2T-CHM13**  
**assembly of human chromosome 15**

Matko Glunčić, Ines Vlahović, Marija Rosandić, Vladimir Paar

Corresponding author: [matko@phy.hr](mailto:matko@phy.hr)

**The Supplementary file includes:**

Figs. S1 to S4

Tables S1 to S5

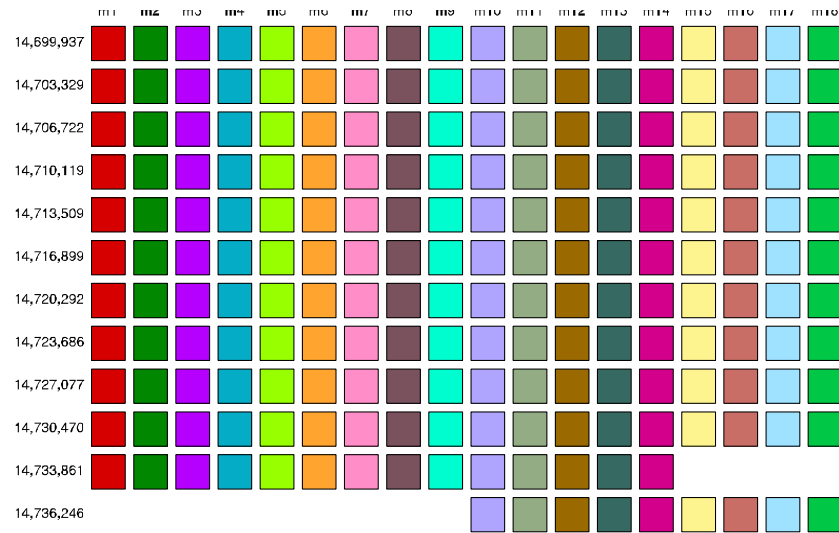

**Figure S1. Willard's type 18mer alpha satellite HOR alignment (hor01).** Start position 14,699,937 bp and end position 14,737,927 bp in T2T-CHM13. The numbers on the left side indicate the initial position of the first monomer in each HOR copy.

**Figure S2. (separate file) Willard's type 25mer/26mer alpha alpha satellite HOR alignment (hor02).** Start position 15,417,939 bp and end position 15,692,443 bp in T2T-CHM 13. The numbers on the left side indicate the initial position of the first monomer in each HOR copy.

**Figure S3. (separate file) Cascading 15mer alpha satellite HOR alignment (hor03).** Start position 16679039 bp and end position 17,683,163 bp in T2T-CHM 13. The numbers on the left side indicate the initial position of the first monomer in each HOR and SubHOR copy.

**Figure S4. (separate file) Cascading 20mer alpha satellite HOR alignment (hor04).** Start position 15,993,645 bp and end position 16,555,446 bp in T2T-CHM 13. The numbers on the left side indicate the initial position of the first monomer in each HOR and SubHOR copy.

**Table S1. Number of 15mer variant HOR copies in hor03 array.** Labels for individual variants of HOR copies are provided in Figure Fig. 3C.

| <b>Variant HOR copy</b> | <b>No</b>  |
|-------------------------|------------|
| a                       | 279        |
| a'                      | 62         |
| a*                      | 4          |
| b                       | 5          |
| b'                      | 1          |
| c                       | 16         |
| c'                      | 21         |
| d                       | 7          |
| d'                      | 13         |
| e                       | 17         |
| f                       | 4          |
| <b>Total</b>            | <b>429</b> |

**Table S2. Canonical 18mer consensus sequence.**

Monomer type t1

TGAGAAACTGTACTGTGATGTGTGCATCCATCTCACAAAGGTGAAACTTCCTTTT  
GATTGAGCAGTTTTGAAACACTCTTTTTGTACAATCTGCAAGTGGATATTTGGAG  
CCCTTTGGGGCCCATGGTGGAAAAGGAAATATCTTCACATAAAAACTACACAG  
AAGCATTC

Monomer type t2

CGAGTAGCTTCTTTGTGATGCGTGCGTTCATCTCACAGAGTTGAGCCTTTCTTTTG  
ATTGAGCAGTTTTGAAGCACACTTCTTGTGGAATCTGCAAATGGATATTTGGAG  
CGCTTTGCAGCCTATGGGGGAAAAGGAAATATCTTCGTATAAAAAGCTAGACAG  
AATCACTC

Monomer type t3

TCAGAAACTTCTTTGTGATGTGTACGCTCATCTCACAGAATTCAACCTTGCTTTT  
GTTTGAGAAGTTTTGAAACACTCTTTTTTTAGTATCTGCAAGCAGATATTTGGAG  
TGGTTTGGGGCCTATGGTGGAAAAGGAAATATCATCACATAAAAAGCTCGACAG  
AAGCATTC

Monomer type t4

TAAGAAACTTCTTTCTGATAAGTGCATTCATCTCACAGAGTTCAGCCTTTCTTTTG  
ATTGAGCAGCTGTGAAACACTCTTTTTGTAGAATCTGCAAGTGTATATTTGGAGT  
GCTTTGCGGCCAATGGTGGAAAAGGAAATACCTTCACATAAAAACTAGACAGA  
AGCATTC

Monomer type t5

TGAGATACAGCTTTGTGATGTGTGCATTCGTCTCATAGTGTTAAACCTTTCTTTTG  
ATGGTTCAGTTTTGAAACACTCTTTTTGTAGAATCTGGAAGTGGATATTTGGAGC  
GCTTTGAGGCCTATGATGGAAAAGGAAATGTCTTCACTTAAAAACGAGACAGA  
AGCATTC

Monomer type t6

TGAGAGACTTCTCTGTGAGGTGTCCATTCATCTCGCAGAGTTGAACCTTTCTTTT  
CCTTGAGCAGTTTTGAAACCCTCTGTAGAATCTGCAAGTGGAGATTTAGAGTTCT  
TTGAGTCCTATGGTGGAAAAGGAAATATCTTCACATAAAAACTAGACAGAAGC  
ATTC

Monomer type t7

TGAGAAACCTCTTTGTGATTTGTGCATTCATCTCACAGAGTTGAACCTTTCTTTCA  
ATTGAACAGTTTTGAAACAGTCTTTTTGTGGAATCTGCAATTGGATATATGGAGC  
GCTTTGAGGCCTATGGTTGAAAAGCATTATCTTCACATAAAAAACATCACAGAAG  
AATTC

Monomer type t8

TGAGAAACTACTTTGTGATGTATACATTCATCTCACAGAGTTGAATGAGCAGTTT  
CTTTTGATTGAGCAGTTTTGAAAACTCTTTATGTAGAATCTGCAAGTGTGTATT

TGGAGCACTTTGCGGCCTATGTGGGAAAAGGAATTATCTTCGCACAAAACTAG  
GCAGAAACATTC

Monomer type t9

TGAGAAACTACTTTGTGATGTGTGCATGCATCTCACAGAGTTGAGTCTTTCTTTT  
GATTGAGCAGTTTTGAAACAGTCTCTTTGTAGAAACTGCCAGTAGATATTTGGG  
ACGCCTTGTGGCCTATGGTGAAAAGGGAAATATCTTCACACAAAAACGGAAGC  
ATTC

Monomer type t10

TGGGAAACTTCTTTTTGATGTGTGCATTCATCTCACAGAGTTGAACCTGTCTTTTT  
ATTGAGCAGTTTTGAAACACTCTTTTTGTAGAATCTGCAAGTGAATATTTGGAGC  
ACTTTGAGGCCTATGGTGAAAAGGAAATATCTTCACATAAAAACTAGACAGA  
AGCACTC

Monomer type t11

TGTGAAACTTCCTTGTAATGTATGCGTCCATCACACAAAGTTGAACCTTTGTTTT  
AATTGAGTAGTTAAGAAACACCTTTTCGGAGAATCTGCAAGTGGATATTTGGCA  
TGATTTGCGGCCTATGGTGTAAGGCAATACCTTCATATAAAAACTAGACAGA  
AGTATTC

Monomer type t12

TGAGAAACTCCTTTGTGATGTGTGCATTCATCTCACAGTGTTTAACCTATCTTTTG  
ACTGAGCAGTTTGGAACCCCTCTTTTGGAGAATGTGTAAGTGGATATTTGAAGG  
TTTTTGAGGACTATGGTGGAAGGAAATACCTTCACCTAAAATCTAGGCAGAA  
GCATTC

Monomer type t13

TGAGAAACTTCTTTGTGATGTGTGCATTCATCACATAAAGGTGAAACTTTCTTTT  
GATTGAGCAGTTTGCAACTCTGCTTTTCTAGAGTCTGCTATTGGATATTTGGAGC  
GATTTGCAGCCTATGGTGTAAGGAAATATCTTCACATAAAAAAGTAGACAGA  
AGCATTC

Monomer type t14

TGAGAAGCTTCTTTGTGATGTGTGCGTTCATCTCACAGAGTTGTACATTTCTTTTG  
ATGGAGCAGTTTTGAAACACTCTCTTTGTAGAACCTGCAAGAGGATATTTGGAG  
CGCTTTGTGGTCTATGGTGGAAGGCAATATCTTCCCATAAAAACCAGACAGA  
AGCATTC

Monomer type t15

TGAGAAACTTCTTTGTGACGGGTGCATTCATCACACAGAGTTGAACCTTTCTTTT  
GATTGAACATTTTTGAAAACTCTTTTGTATAATCTGCAAGTGGATATTTGGAG  
CGCTTTGAGGCCCTTGCTGGAAGGAAATATCTTCACATAAAAATCTAGACAGA  
TCATTC

Monomer type t16

TCCCAAAGCGCTGGGATTACAGGCGTGAGCCACCGCGCCCGGCCTGAACTATTC  
TTTTGATTGAGCAGTGTGGAGACAGTCTTTTGGTAGTATCTGAAAATGGATATTA

GGAGCGCTTTGAATCCTATAGAGCAGAAGGAAATATCTTCACATAAAAACTAA  
TCAGAAGCATTC

Monomer type t17

TGAGAAGCTGTTTTTTGATGTGTGCATTCACCCACAGAGTTGAACTTTTCTTTTG  
ATTGAGAAGTATTGAAACTCTCTTTTGTAGAATTTACAAGTGGATACTTGGAGG  
GCTTTGAGGCCTACGGTGGAAAAGGAAATATCTTCACATAAAAACTAGACAGA  
AGCATTC

Monomer type t18

TGAGAATCTTCTTTGTGAGGTGTGCGTTCATCTCACAGAGTTGAACTTTTTTTTA  
TTGGGCAGTTTTGAAACACTCTTTTGTGGAATCTGAAAATGGATATTTGGAGTG  
CTTTGTGGCCTATGGTGGAACAGGAAATATCTTCATATAAAAACTAGACAGAGG  
CATTC

**Table S3. Canonical 25mer and 26mer consensus sequence.**

Monomer type t1

TGAGATTCTTCTTTGTGAGGTGTGCATTCAACTCACAGAGTTGAACTTATCTTTTC  
CTTGAGCACTTTCATATCTCATTTTTCTGTAGAATCTGCAAGTGGATATTTGGAGC  
TCTTTGCACCCTGTGGTGGAAAGGGAACTATCTTCATATAAAAACTACAAAGAA  
GCATTC

Monomer type t2

AGAGAAACTTCTTGTGATGAATGCATTCCTCACACAGAGCTGAACCTTTCTTTTT  
ATTGAGCAGTATTGAAACGCTCTTTTTGCAGAATCACCAAGTGGATATTTGGAG  
AGCTTTGGGGCCTGTTTTGGAAAATGAAATATCTTCAAAGTAAAACTACACAGA  
ACCATTC

Monomer type t3

TGAGAAACTTCTTTATGATGTGTGCATTCAACTCTCAGAGTTGAACCTACCTTAT  
GATTGAGCAATTTGGAAACACTCTTTTTGTAGAGCCTGCAAGTGGATATTTAGA  
ACGATTTGAGGCCTATTGTGGAAAAGCAAATATCTTCACATAAAAACTACACA  
GAAGCATTC

Monomer type t4

TGAGAAACTTCTTTGGCATGTGTGCATTCAACTAACAGTGTTGAACGTATCTTTT  
GATTGAGCAGCTTAGAATCTCTCTTTTTGTAGAAAATGCAAGTAGATATTTGGA  
GCCCCATTTTGCCCTATGGTAGAAAACAAAACATCTTCACATAAAATCTACACA  
GAAGCATTC

Monomer type t5

TGAGAAACTTCTTTGTGATGTTTGCATTGAACTCCCAGAGTCGAACCTATCTTTT  
GATAGAGCACTTTTGTATCTCTCTTTTTGCGGAATCTGCAAGTGGATATTTGGAA  
AGCTTGAGGCCTATTGTGAAAAAGGAAATATCTTCACATAAAAACTACAGAGA  
AGCATTC

Monomer type t6

TGAGAAACTTCTTTGTGAGGCATGGATTCAACCCACAGAGTTGGACTTATCATT  
GAGCAGTTTTGAATCTCTCTTTTTGTGCAATCTGCAAGTGGATATTTGGAGCCCT  
TTGCAACCTAGGGTGGAAAAGGAAATACCTTCAAATAAAAACTATATAGAAGC  
ATTCCG

Monomer type t7

TAAAACTTCTTTGTGATGTGTGCATTCGTCTCACAGAGTTGAACCTATCTAATGA  
TTGAGCGGTTTTGAAACACTCATTTTTGTAGAACCTGCAAGTGGATATTGGGAGT  
ACTTTGTGGCCTTCTTTGGAAAAGGGAATATCTTCACATAAAAACTACAAAGAA  
GCATTC

Monomer type t8

TGAGAAACTTCTTTGTGATGTGTGCATTCATCTCACAGTGTTGGACGTTTCTTTTG  
ATAGGGCAGTTTTGAAACACTCTTTTTCTAGAATCTGCAAGTGGATATTTGGAGC



GCTTTGAGGCCTAATGTGGAAAATCAAATATCTTCACATAAAAACTACACAGA  
GGCATT

Monomer type t9

TGAGAAACTTCTTTTTTGTGTGTGCATTCAACTCACATAGTTGAAGTAATCTTTG  
GATTTAGCTGTTTTGAATCTCCTTTTTGCAGAATCTGCAAGTTGATACTTGGAGC  
CCTGTTTCACCCTATAGTGGAAAAGCAAATATCTTCACATAAAACAAACCCTACA  
GAGAAGCATT

Monomer type t10

AGAGAAAGTCCTTTGTGATGTGTGCATTGAACATGCAGAGTTGACACTATCTTTT  
GATTGTACAGTTTTGAATACGTCTTTTTGTAGAATCTGCAAGTGGAAGTTTGGAG  
CTGTTTGCACCCTGTGGTGTAAGGAAATATCTTCATATAAAAGCTACACAGA  
AGCAT

Monomer type t11

AGAGAAAGTCCTTTGTGATGTGTGCATTGAACACGCAGAGTTGAAACTATCTTT  
TGATTGTACAGTTTTGAATATCTCTTTTTGTAGAATCTGCAAGTGGAAGTTTGG  
GCTGTTTGCACGCTGTGGTGCAAAAGGAAATATCTTCATATAAAAACTACACAG  
AAGCTT

Monomer type t12

TCAGAAAGACTTCTTTGTGATGAATGCGTTCCTCACACAGAGTTGAATCTTCCTT  
TTTATTGAGTAGTATTGAAACCCTCTTTTTGCAGAATAACCAGGTGGATATTTGG  
AGAGCTTTGAGGCCTGTTTTGGAAAAGCAAATATCTTCAAATTAACCACACA  
GAAGCATT

Monomer type t13

TGAGAAGCTTCTTTGTGATGTGTGCATTCAACTCTCAGAGTTCAACGTGTCTTAT  
GATGGAGCAGTTTGGAAACACTCTTTTTGTAGAACTGCAAGTGATATGTAG  
AGCGATTTGAGGCCTACTGTGGAAAAGCAAATATCTTCACATAACAACTACAC  
AGAAGCACTCC

Monomer type t14

TAGAAACTTCTTTGTGATGTGTGAATTCAACTCACAGAGCTGAACCTATCTTTTG  
ATGGAGTAGCTTAGAATCTCTCTTTTTTAGAATCTGCACGTGGATATTTGGAGC  
GCTTTGAGACCTAAAGTGGAAAAGCAAATATCTTCACATAAAATCTACATAGA  
GGCACTC

Monomer type t15

TAAGAAACTTCTTTTTGATGTGTGCATTACCTCACAGAGCTGAACCGATCCTTC  
GAGTGACCAGTTTGAATCTCTCTTTTTATACAATCTGCAAGTGATATTTGGAG  
CCCTTTGCGGCCTATGGTGGAAAAGGAAATATCTTCAAATAAAAACTACACAG  
AAGCATT

Monomer type t16

TAAGAAACTTCTTTTTGATGTGTGCATTCAACTCACAGAGCTGAAGCACACAGT  
GCTTGAGTGACCAGTTTGAATCTCTCTTTTTGTACAATCTGCAAGTGATATTG

GGAGCCCTTTGCGGCCTGTGGTGGAAAAGGAAATATCTTCAAATAAAAACTAC  
ACAGAAGCATTC

Monomer type t17

TGAGAAACTTCTTTGTGATGTGTACATTCATCTCACAGAGTTGACAATTTCTTTTG  
ATTGAGCAGTTTTGAAACACTGCTTTTGTAGAGTCTGGAAGTTGATATTTGGAGG  
GCTTTGAGGTCTATTTTCGGAAAAGAAAATATCTTCACTTAAAAACTAGGCAGAA  
ATACTG

Monomer type t18

TGAGAAACTTCTTTGTTATGTGAGCATTCAACTCACAGAGTTGAACCTATCTTTT  
GATTGAGCAGTTTTGAATCTCTCATTTTGCAGAATCTGCAAGGGGATATTTGGAG  
CCCTTTGCGGCCTATGGTGGAAAAGGAAATACCTTCAAATGAAAAGCACACAG  
AGGCATTC

Monomer type t19

TGAGAAACTTCCTCGTGATTGTGCATTCAACTCACAGAGTTAAACCTATCTTATG  
ATTGACCAGTTTTGGAACACTCTTTTCATAGGATCTGCAAGTGGATATTTGGCGT  
GCTTTGAGGCCTATCGTGGAAAAGCAAATAACTTCAGATAAAAACTATACAGA  
AGCATTC

Monomer type t20

TGAGAAACTTCTTTGTGATGTGTGCATTGATCTCACAGAGTTGAAAGTGTATTTT  
GATTGAGCAGTTTTGAAACACTCTTTTTGTAGAATCTGCAAGTGGATAATTGGG  
GAGATTTGAGGTATATTGTGGAAAAGCAAGTATCTTCATATAAAAACTATACAG  
AAGCTTTC

Monomer type t21

TGAGAAACATCTTTGTGAGGTTTGCATTCAACTCACAGAGCTGGAACCTATCTTTT  
GAGTGACCAGTTTTGAATCTCTCTTTTTGTACAATCTGCAAGTGGATATTTGGAG  
CGTTTTGAGGCCTACATTTGAAAATCAAATATCTTCCCTTAAAAGCTACACAGA  
AACATTC

Monomer type t22

TCAGAAATTGTTTGTGCATGTGTGCTTTCAAATTACCAAGTTGAACCTACCTTGTG  
ATTGAGCAGTTTTGAATCTCTCTTTTTGTGGAATCTGCAAGTGGATATTTTATGCC  
ATTTGCGGACTGTGGTGGAAAAGGAATTATCTTCAAATCCATTCTACACAGAAG  
CAT

Monomer type t23

TCAGACAAACTTTTTGTGATGAGTGCATTGGTCACACAGAATTGAACCTCTCCTT  
TGATTGAGCAATTCTGAAACACTCTTTCAGAGGGTCTGCAAGTGGATATTTTAG  
AGCTTTGGGACAATTGTGGAAAAGTAAATATCTTCACATAGAACTACACGGA  
AGCATTC

Monomer type t24

TGAGAAACTTCTTTGGAGGTGTGCATTCAACTCACAGAGTTGAACCTATCTTTTC  
ATTGAGCAGTTTTGAATCTCTCTTTTTGTAGACTCTGCTTGCAGATATTTGGAGA

GCTTTGAGGCCTATTGTGGAAAAGGAATCATCTTCACATAAAAAACACACAGAA  
GCACTC

Monomer type t25

TGAGAAACTTCTTTGTGAAGTGTGCATTCAACTCACAGAGTTGAACCTATCTTTT  
GATTGAGAAGCTTTGAATCTCTCTTTTTGTAGAAGCTGCATGTGGATATTTGGAG  
ACGTTTGTGGCCTATGGTAGAAAAGGCAATATCTTCAAATAAAAACTAGACAG  
AAGCATTT

Monomer type t26

TGAGAAATTTCTCTGTGCTGTGTGCATTCATATCACATGGTTGAAACTACCTTTT  
GGTTGAGCAGTTTTGAATCTCTCTTTTTGTAACATCTGCAATGGATATTTGGAGC  
CCTTTGTGGTCTGTGGTGGAAAAGGAACTATCCTCAAATAAAAACTACACAGA  
AGTATTC

Monomer type t27

CGAGAAACTTCCTTGTGATGTGTGCATTCATCTCACAGGGTTGAACCTTTGGTTT  
GATTGAGCAGTTTTGAGACAATCTTTCCATAGAATCTGGAAGTGAATATTTGGA  
GAACCTTGAGATCTATTTTGGAGAAGGAGATATCTTTATATGAAAACCTGCACAG  
AAGCATTC

Monomer type t28

TGAGAAACTTCTTTGTGATGTGTGCATTTATCTCACAGAGTTGAACCTTTGGTTT  
GATTGAGCAGTTTTGAGATAATCTTTCCATAGAATCTGGAAGTGAATACTTGGA  
TAACTTTGAGATCTATTTTGGAGAAGGAGATATCTTTATATAAAAACTGCACAG  
AAGCATTC

Monomer type t29

TGAGAAACATCTTTGTGAGGTGTGCAATGAAGTCACAGAGTTGAAACTATGTTT  
TGATTCAGCAGTTTTGAGTCTCTCTTTTTGCAGAATCTGCGAGTGGATATCTGGA  
GAACTTGAGGCCTATTTGGAAAAGGAAATATCTTCACATATAAACTATGCAGA  
AGCATTT

**Table S4. Canonical cascading 15mer consensus sequence.**

Monomer type t1

TCAGAAACTTATTTGTGATGTGTGTCCTCAACTAACAGAGTTGAACCTTTGTTTT  
GATACAGCAGTTTGGAAACACTCTTTTTGTAGAATCTACAAGTGGATATTTTGAG  
AGCATTGAAAATTCGTTGGAAGCGGGAAAACCTTCATATAAAATCTAGACAG  
AAGCATTC

Monomer type t2

TCAGAAACTGCTTTGTGATGTTTGCATTCAAGTCACCTAGTTGAACATTCCCTTT  
CATAGAGCAGGTTTGAATCACTGTTTCTGTCTGTATCTGGAAGTGGATATTTTCGAG  
CGTTTTTCAGGCCTAAGGTGAGAAAGGAAATGTCTTCAAATAAGAACTAGACAG  
AAGCATTC

Monomer type t3

TCAGAAACTTGTTTGTGACGTGTGTATTCAACTAACAGAGTTGAACCTTTCTTTTT  
ACAGAGCAGCTTTGAAACCCTGTTTTTGTGGAATCTGCAATTGGAAATTTTCGAT  
AGTTCTGAGGATTTTCGTTGGAAACGGGATTACAAATAGAAAGTAGACAGCAGC  
ATTC

Monomer type t4

TCAGAAACTTCTTTGTAATGTTTGCATTCAACTCATAGAGTTGAACATTCCCTAT  
CATACAGCAGGTTTGAACACTCTTTTTGTAGTATGTGGAAGTGGACATTTGGA  
GCGCTTTGAGGCCTACGGTGAAAAAGGAAATATCTTCCCATAAAAACTAGACA  
GAAGCATTC

Monomer type t5

TCAGAATCTTCTTTGTGATGTATGCCCTCAATTCACAGAGTTGAACCTTTGTTTG  
GATACAGCATTTTGGAAACATTCCCTTTGTAGAATCTGCAAGTTGATATTTGGAT  
AGCTTTGAGGATTTTCGTTGGAAACGGGAATATCTACATATAAAATCTAGACAGA  
AGCATTC

Monomer type t6

TCAGAAACCTCTTTGTGATGTGTGTACTCAACTAACAGAGTTGAACCTTCCTTTT  
CACAGAGCAGTTTGGAAACACTCTTTTTGTGGCATTGCAAGTGGATATTTGGAT  
AGCTTTGAGGATTTTCGTTGGAAACGGGAATATTTTCATATAAAATCTAGACAGA  
AGCATTC

Monomer type t7

TCAGAATCTTCTTTGTGATGTTTGCATTCAACTCATAGAGTTGAACATTCCCTTTC  
ATACAGCACGTTTGAACACACTTTGTGGAGTATGTGGAATGGACATTTTCGAG  
CACTCTTAGGCCTAAGGTGAAAAGGGAAATATCTTCAAATAAAAACTAGTCAG  
CAGCATTC

Monomer type t8

TCAGAACCTGCTTTGTGATGTTTGCATTCAACTCACAGAGCTGAACATTCCCGTT  
CATAGAGCAGGTTTGAACACTCTTCTGTACTATCTGGAAGTGGACATTTTCA

GCGCTTTCAGGCCTATGGTGAAAAAGGAAACATCTTCAAATAAAAACTAGACA  
GAAGCATTC

Monomer type t9

TCGCAATCTTGTTTGCCATGTGTGTACTCAACTAACAGAGTTGAACCTATCTTTT  
GACAGAGCAGTTTTGAAACACTCTTTTTGTGGAATCTGCAAGTGGATATTTGGAT  
AGCTTCGAGGATTTCGTTGGAAACGGGAATATCCTCATTTAAAATCTAGACGGA  
AGCATTC

**Table S5. Canonical Cascading 20mer consensus sequence.**

Monomer type t1

TGAGAACTTCTCTGTGAGGTGTGCTTTCAACTCACAGAGTTGAACCTATCTTTT  
GATTGAGAAGTTTTGAATCTCTCTTTTTGTAGAAGCTGCATGTGGATATTTGGAG  
ACGTTTGTGGCCTATGGTAGAAAAGGAAATATCTTCAAATAAAAACTAGACAG  
ACGCATTT

Monomer type t2

TGAGAACTTCTTTGGAGGTGTGCATTCAACTCACAGAGTTGAACCTATCTTTTC  
ATTGAGCAGTTTTGAATCTCTCATTTTGTAGACTCTGCTCGCAGATATTTGGAGA  
GCTTTGAGGCCTATTGTGGAAAAGGAAATATCTTCACATAAAAAACACACAGAA  
GCACTC

Monomer type t3

TCAGACAACTTCTTTGTGATGAGTGCATTGGTCACACAGAATTGAACCTTCCCT  
TTGATTGAGCAATTCTGAAACACTCTTTTGGAGGGTCTGCAAGTGGACATTTTAG  
AGCTTTGGGACAACCTGTGGAAAAGTAAATATCTTCACATAAAAACTACACGGA  
AGCATTC

Monomer type t4

TCAGAAATTGTTTGTGCATGTGTGCTTTCCAATTACCAAGTTGAACCTATCTTGTG  
ATTGAGCAGTTTTGAATCTCTCTTTTTGTGGAATCGGCAAGTGGATATTTTATAGC  
CCTTTGCGGACTGTGGTGGAAAAGGAATTATCTTCAAATCAATTCTACACAGAA  
GCAT

Monomer type t5

TGAGAAACATCTTTGTGATGTGTGCATTCAGCTCACAGAGCTGGACCTAACTTTT  
GAGTGACCAGTTTTGAATCTCTCTTTTTGTACAATATGCAAGTGGATATTTGGAG  
CGATTTGAGGCCTACATTTGAAAATCAAATATCTTCCCTTAAAAACTACACAGA  
AACATTC

Monomer type t6

TGAGAACTTCTTTGTGATGTGTGCATTGATCTCACAGAGTTGAAAGTTTATTTT  
GATTGAGCTGTTTTGAAACACTCTTTTTCTAGAATCTGCAAGTGGATAATTGGGG  
AGATTTGAGGCATATTGTGGAAAAGCCAATATCTTCATATAAAAACTATACAGA  
AACCTTC

Monomer type t7

TGAGAAACACCCTTGTGAGGTGTGCATTGAAGTCACAGAGTTAAACCTATCTTT  
TGATTGAGCAGATTTGAATCTCTCTTTTTGCAGAATCTGCGAGTGGATATTTGGA  
GTGCTTGGAAGCCTGCTGTGGAAAATCAAATATCTTCACAAAAAAACTACAC  
AGAAGCATTC

Monomer type t8

AGAGAACTTCTCTGTGATGAGTGCATTCATCACACAGAGTTGAACATTTGTTT  
AGATTTAGCAGTGTTGAGACAATCTTCCGTAGAATCTTGAAGTGAATATTTGG

AGGGCTTTGAGACCTGCTTTGGAGAAGGAGATATCTTCATATAAAAACTACACA  
GAAGCTTTC

Monomer type t9

TGTGAAACTTCTTTGCGATGTGTGCATTCAACTCACAGTGTTGAACCTATGTTTT  
GATTGAGCAGTTTGGAAATCTCTCTTTTTGTAGAATCTGCAAGTGAATATTTGGAG  
CCCTATTTGCGCCCTATACTGGAAAAGCAATTATCTTCAAATAAAAACTGCACAG  
AAGCATTC

Monomer type t10

TGAGAAACTTCTTTGCGATGTTGGCATTCAACTCACAGAGTCGAATCTATCTTTT  
GATAGAGCAGTTTTGTATCTCTCTTTTTGCAGAATCTGCAAGTGGATATTTGGAA  
AGCTTTGAGGCCTATTGTGGAAAGGGAAATATCCTCAAATAAAAACTACCCAG  
AAGCACTC

Monomer type t11

TGAAAAACATCTTTGGGATGTGTGCATTCAACTAACCGTGTTGAAACAATGTTTT  
GATTGAGCAGCTTAGAATCTCTCTTTTTGTAGGAAATGCAAGTGGATATTTGGA  
GCCCCATTTGCGCCCTATGGTGGAAAACGAAACATACTCACAAAAAAGCTGCAG  
AGAAGCATTC

Monomer type t12

TCCGAGAACTTCTTTGTGATGTGTGCATTCAACTATCGGAGTTGAACCTATCTT  
ATGATTGAGGAGTTTGGAAACACTCTTTGTAGAGTCTGCAAGTGGATATTTACA  
GAGATTTGAGGCCTATTGTGGAAAAGGAAGTATCTTCACATAAAAAACACACA  
GAAGCACTC

Monomer type t13

AGAGAAACTTCTTTGTGATGAATGCATTCATCACACAGAGTTGAACCTTTGTTTT  
GATTTAGCAGTTTGAGACAATCTTTCCGTAGAATCTTGAAGTGAATATTTGGAG  
GGCTTGAGATTCTGTTTTAGAGAAGAAGATATCTTCATCAAAAACTACACAGAA  
GCTT

Monomer type t14

TGAGAAACTACTTTGTGATGTGTGCATTCATCCACAGAGTAGAACCTTTCTTTT  
GATTGAGCAGTTTCGAAACACTCTTTTGGTGGAAATCTGCAAGTGGACATTTGGA  
AAGCTTTGAGGCCTATTGTGGAAAGGGAAATATCTTCAAATAAAAAACCCCA  
GAAGTACTC

Monomer type t15

TGAGAAACTTCTCTGTCATACGTACATTCATCTCACAGGGTTGATCCTATTTTAT  
GATTGAGCAGTTTTGGAACACTCTTTTTGTAGAATCTGCAAGTGAATATTTGGAG  
CTCTTTGGGGCCTACTGTGGAAAAACAAATATCTTCACATAAAAACTACACAGA  
AGCATTC

Monomer type t16

TGAGAAACTTTTTTTGTGATGTGGTCTTTCAGCTAATGGAGTAGAACTATCTTT  
TGATTGAGCAGTTTTGAATCTCTCTTTTTGCAGGATCTACGAGTGGATAATTGGA

GAACTTTGAGGCGTACTGTGGAAAGTCGAATATCTTCGCATAAAAACTACACAG  
AAGCATTC

Monomer type t17

TGAGAAACATCCTTGTGAGGTGTGCACTGAAGTCACAGAGTTGAAACTGTCTTT  
TGATTCAGCAGTTTTGAATCTCTCTTTTTGCAGAATCTGTGAGTGGATATTTGGA  
GCGCTTTGAGGCCTACTGTGGAAAACCAAATATCTTCACATAAAAACTACACAG  
AAGCATCC

Monomer type t18

TGAGAAACTTCTTTGTGATGTGGGCATTCATCTCACAGAGTTGAACCTTTGGTTT  
GATTGAGCAGTTTTGAGACAATCTTCCATAGAATCTGGAAGTGAATATTTGGA  
GAACTTTGAGATCCATTTTGGAGAAGGAGATATCTTTATATAAAAACTACACAG  
AAGCATTC

Monomer type t19

TGAGAAAATTCTCTGTGCTGTGTGCATTCATATCACATGGTTGAAACTACCTTTG  
GATTGAGCAGTTTTGAATCTCACTTTTTGTACCATCTGCAATGGATATTTGGAGC  
CCTTTCTGGTCTGTGGTGGAAAAGGAACTATCCTCAAATAGAACTACACAGAA  
GTACTC

Monomer type t20

TGAGAAACTTCTCTGTCATACGTACATTCATCTCACAGGGTTGATCCTATTTTCAT  
GATTGAGCAGTTTTGGAACACTCTTTTTGTAGAATCTGCAAGTGAATATTTGGGG  
CCTACTGTGGAAAAACAAATATCTTCACATAAAAACTACACAGAAGCATTC
