# Supplementary figures and images for: Novel Concept of Alpha Satellite Cascading Higher-Order Repeats (HORs) and Precise Identification of 15mer and 20mer Cascading HORs in Complete T2T-CHM13 Assembly of Human Chromosome 15
Source: MDPI journal article supplement (doi:10.3390/ijms25084395), 2024-04-16

Supplementary Fig. S2

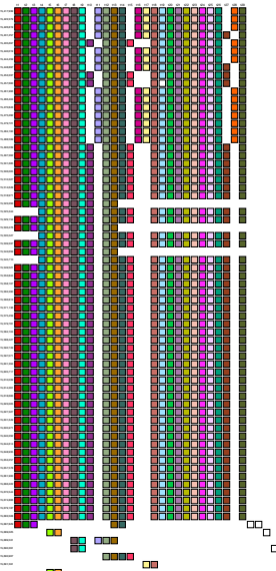

Supplement: s1 [file s1]

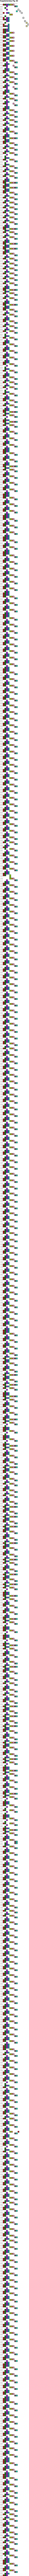

Supplement: s1 [file s1]

Supplementary Fig. S4

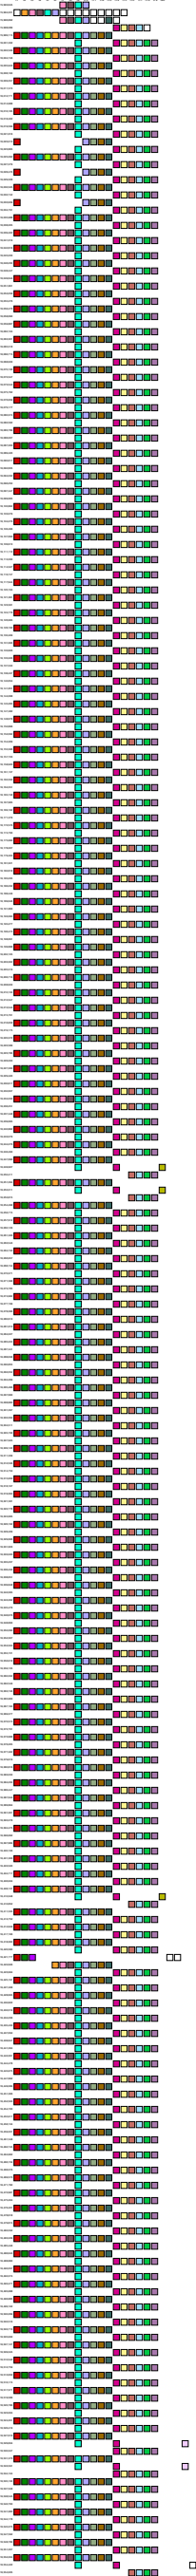

Supplement: s1 [file s1]
